# Supplementary material
Source: PubMed Central journal article supplement (PMC4014247)
Supplement: ijcep0007-1667-f3.pdf [file ijcep0007-1667-f3.pdf]

## Next-generation sequencing in CMML dFFPE samples

**Supplementary Table 1.** Excluded TET2 single nucleotide variations outside of evolutionary conserved Regions

| Sample | Diagnosis | Variation 1 | Variation 2 | Variation 3 |
|--------|-----------|-------------|-------------|-------------|
| 5      | CMML2     | p.N715D     |             |             |
| 8      | CMML2     | p.N715D     |             |             |
| 14     | CMML1     | p.S1708N    | p.G1754S    | p.G1697E    |
| 23     | CMML2     | p.G613W     |             |             |
| 26     | CMML2     | p.L406P     |             |             |
| 28     | CMML1     | p.A575S     |             |             |
| 33     | CMML1     | p.S86P      | p.P851L     | p.S1775N    |
